# Supplementary material
Source: ML conference proceedings conference paper supplement (https://openreview.net/forum?id=hbGV3vzMPzG)
Supplement: supplementary_material [file attachment]

# ON THE IMPACT OF HARD ADVERSARIAL INSTANCES ON OVERFITTING IN ADVERSARIAL TRAINING

**Anonymous authors**

Paper under double-blind review

## 1 SUPPLEMENTARY MATERIAL

- The Appendix, including the notation table, proofs, experimental settings and additional experimental results are attached immediately after the main body of the paper.
- The code is submitted anonymously on GoogleDrive. The link is as follows:  
[https://drive.google.com/file/d/1vb6ehNMkBeNIM3dLr\\_igKMUCgBd9ZmK/view?usp=sharing](https://drive.google.com/file/d/1vb6ehNMkBeNIM3dLr_igKMUCgBd9ZmK/view?usp=sharing).
